# Supplementary material for: Prolonged Transcriptional Consequences in Survivors of Sepsis
Source: MDPI journal article supplement (doi:10.3390/ijms22115422), 2021-05-21
Supplement: s1 [file s1]

Supplementary Materials:

Figure S1: Activation pathways in 14 days sepsis survivors

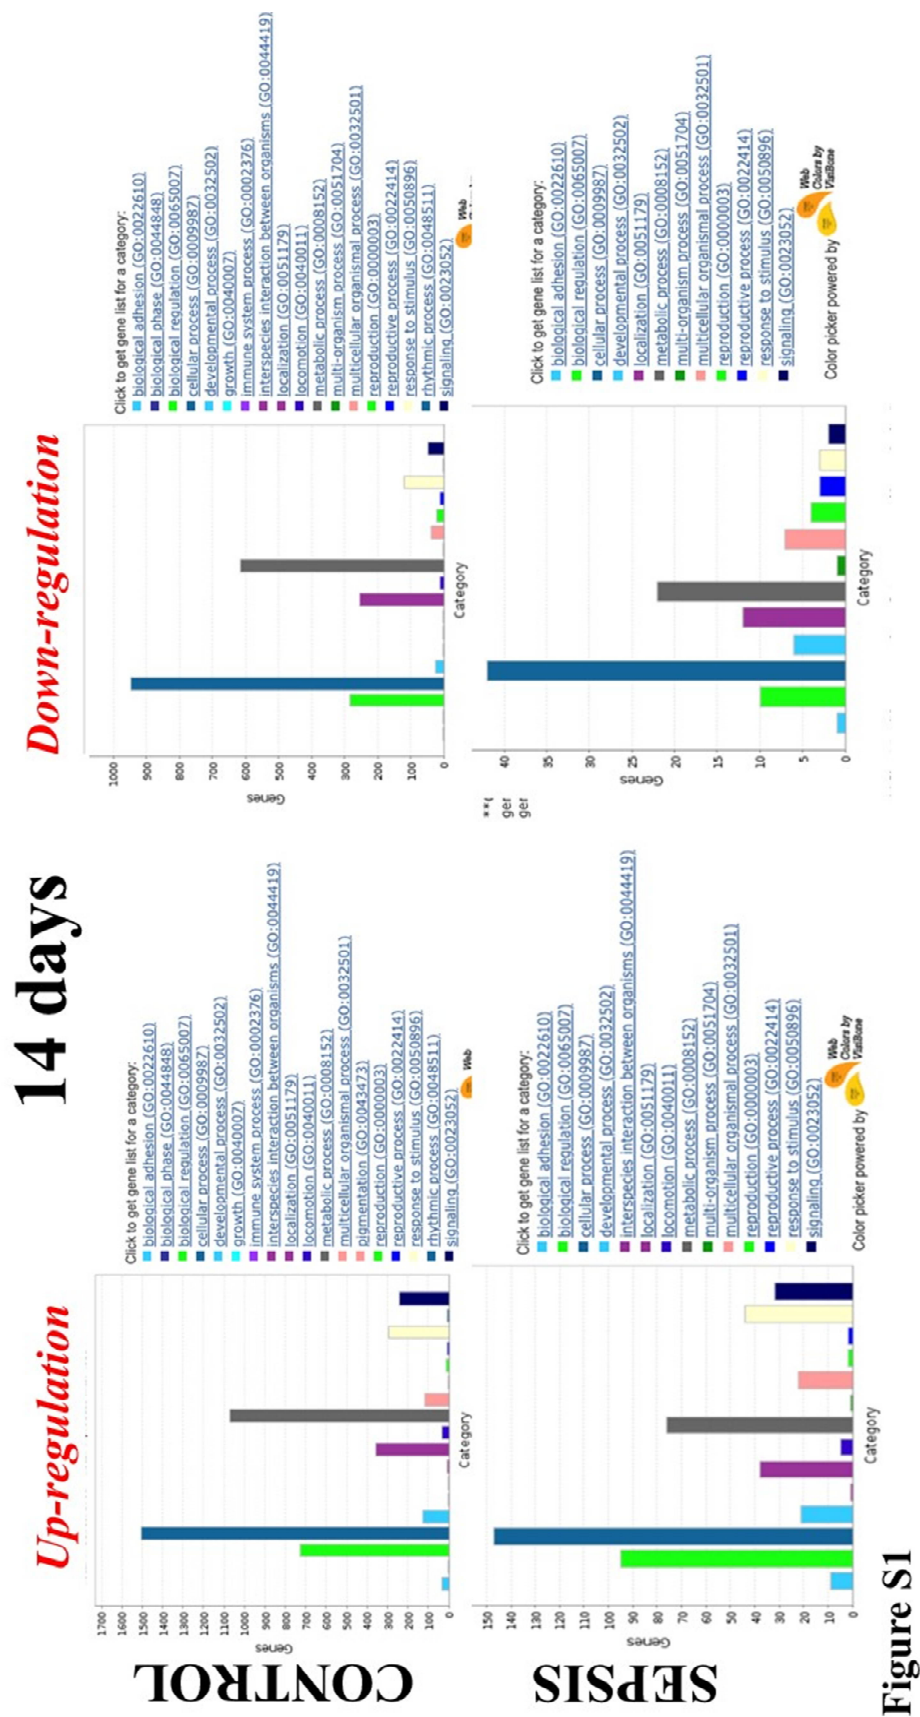

Figure S1

Figure S2: Activation pathways in 21 days sepsis survivors

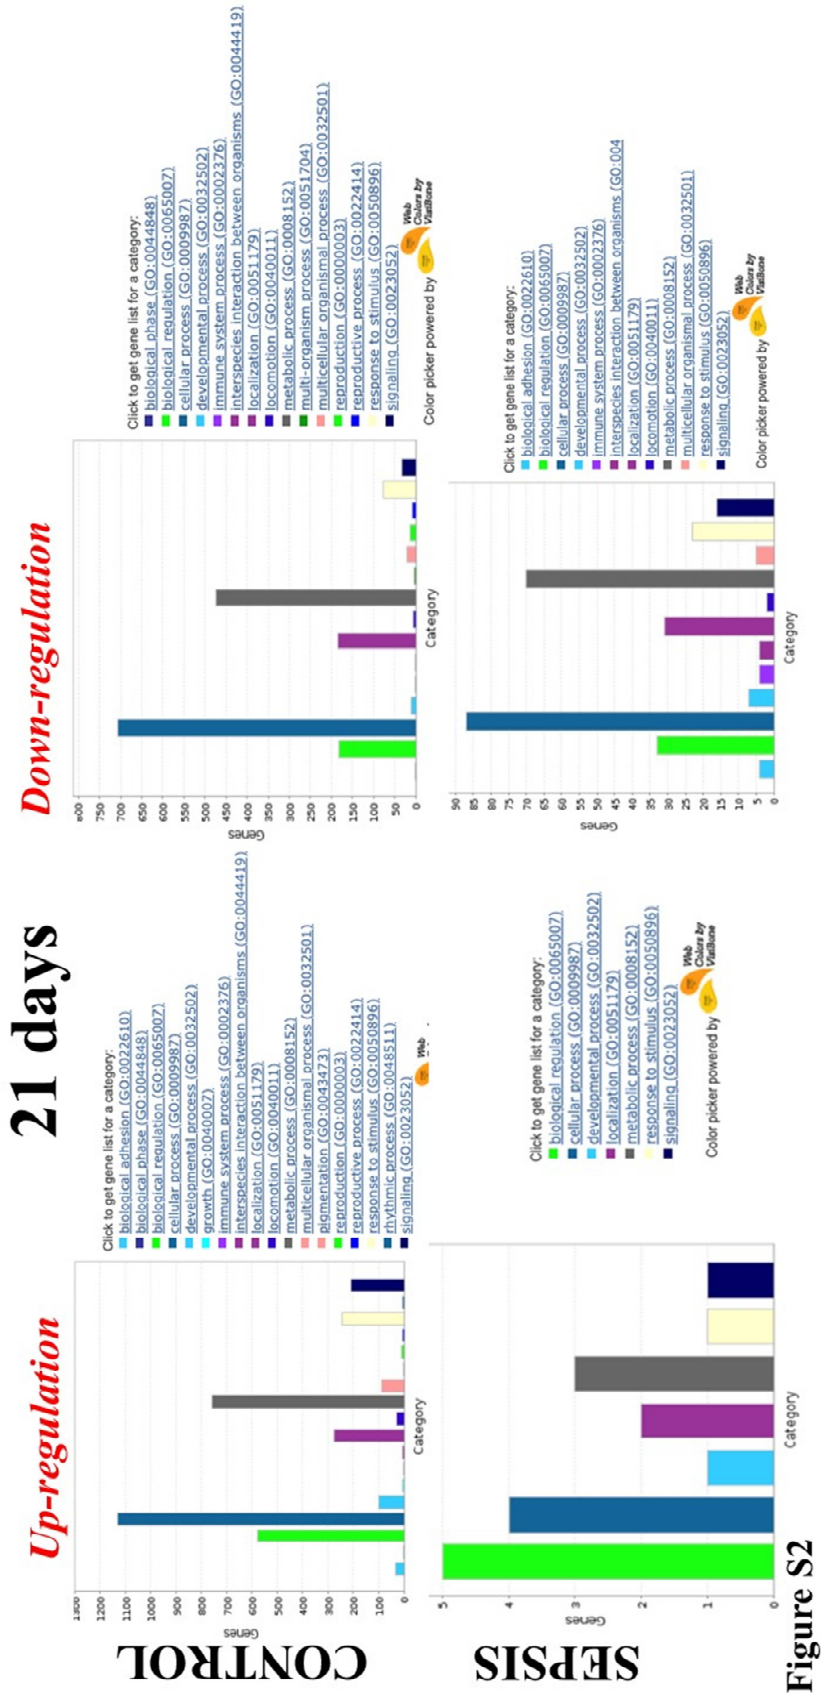

Figure S3: RNA-seq workflow.

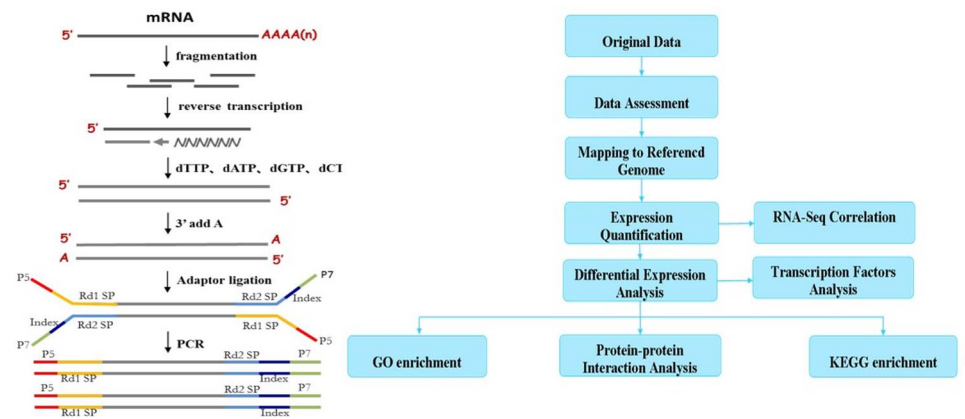

Figure S1
